# Supplementary material for: Immunogenicity, Safety, and Anti-Viral Efficacy of a Subunit SARS-CoV-2 Vaccine Candidate in Captive Black-Footed Ferrets (Mustela nigripes) and Their Susceptibility to Viral Challenge
Source: MDPI journal article supplement (doi:10.3390/v14102188), 2022-10-04
Supplement: s1 [file s1]

# Immunogenicity, safety, and anti-viral efficacy of a subunit SARS-CoV-2 vaccine candidate in captive black-footed ferrets (*Mustela nigripes*) and their susceptibility to viral challenge.

Ariel E. Leon <sup>1</sup>, Della Garelle <sup>2</sup>, Airn Hartwig <sup>3</sup>, Elizabeth A. Falendysz <sup>1</sup>, Hon S. Ip <sup>1</sup>, Julia S. Lankton <sup>1</sup>, Tyler N. Tretten <sup>2</sup>, Terry R. Spraker <sup>4</sup>, Richard Bowen <sup>3,†</sup>, Tonie E. Rocke <sup>1,\*,†</sup>

## Supplementary Materials

**Table S1.** Weights of transgenic mice that received passive transfers of black-footed ferret (*Mustela nigripes*; BFF) serum either from vaccinated (positive serum) or unvaccinated against SARS-CoV-2 BFF (negative serum), a monoclonal anti-S1 protein (monoclonal AB) or a sham transfer (negative) and then subsequently challenged with SARS-CoV-2. A subset of animals had adverse reactions to the passive transfers of BFF serum, which were euthanized.

| Cage | Mouse ID | BFF ID   | treatment      | weight (g) by day post-inoculation |                                                        |       |       |       |       |       |
|------|----------|----------|----------------|------------------------------------|--------------------------------------------------------|-------|-------|-------|-------|-------|
|      |          |          |                | day -1                             | day 0                                                  | day 1 | day 2 | day 3 | day 4 | day 5 |
| 1    | 1        | 8593 -3  | positive serum | 19.52                              | 18.24                                                  | 18.5  | 18.86 | 19.37 | 19.81 | 19.74 |
| 1    | 2        | 8593 -12 | positive serum | 20.79                              | 20.21                                                  | 20.53 | 21.52 | 21.34 | 21.95 | 21.78 |
| 1    | 3        | 8847 -2  | positive serum | 22.09                              | 22.21                                                  | 20.40 | 19.67 | 18.93 | 18.74 | 17.98 |
| 1    | 4        | 8847 -12 | positive serum | 20.20                              | 22.59                                                  | 23.01 | 23.41 | 23.40 | 24.51 | 24.89 |
| 2    | 5        | 8995 -2  | positive serum | 20.32                              | euthanized due to adverse reaction from serum transfer |       |       |       |       |       |
| 2    | 6        | 8995 -12 | positive serum | 20.80                              | 20.25                                                  | 20.08 | 20.42 | 21.44 | 22.25 | 20.65 |
| 2    | 7        | 9135 -2  | positive serum | 23.39                              | euthanized due to adverse reaction from serum transfer |       |       |       |       |       |
| 2    | 8        | 9135 -12 | positive serum | 21.05                              | 20.76                                                  | 20.98 | 21.62 | 22.39 | 22.62 | 22.36 |
| 3    | 9        | 9189 -3  | positive serum | 19.87                              | 19.10                                                  | 19.30 | 20.23 | 20.22 | 20.41 | 20.56 |
| 3    | 10       | 9189 -12 | positive serum | 18.00                              | 17.09                                                  | 17.99 | 18.05 | 17.84 | 17.62 | 17.00 |
| 3    | 11       | 9219 -3  | positive serum | 21.16                              | 21.08                                                  | 19.72 | 19.46 | 18.81 | 18.83 | 19.31 |
| 3    | 12       | 9219 -12 | positive serum | 20.05                              | 19.30                                                  | 18.25 | 17.87 | 17.07 | 17.51 | 18.05 |

**Immunogenicity, safety, and anti-viral efficacy of a subunit SARS-CoV-2 vaccine candidate in captive black-footed ferrets (*Mustela nigripes*) and their susceptibility to viral challenge.**

Ariel E. Leon <sup>1</sup>, Della Garelle <sup>2</sup>, Airn Hartwig <sup>3</sup>, Elizabeth A. Falendysz <sup>1</sup>, Hon S. Ip <sup>1</sup>, Julia S. Lankton <sup>1</sup>, Tyler N. Tretten <sup>2</sup>, Terry R. Spraker <sup>4</sup>, Richard Bowen <sup>3,†</sup>, Tonie E. Roche <sup>1,\*,†</sup>

|   |    |          |                |       |                                                        |       |       |       |       |       |
|---|----|----------|----------------|-------|--------------------------------------------------------|-------|-------|-------|-------|-------|
| 4 | 13 | 9337 -2  | positive serum | 17.98 | euthanized due to adverse reaction from serum transfer |       |       |       |       |       |
| 4 | 14 | 9337 -12 | positive serum | 21.48 | 21.2                                                   | 19.9  | 19.96 | 20.44 | 20.82 | 20.03 |
| 4 | 15 | 9371 -3  | positive serum | 20.49 | euthanized due to adverse reaction from serum transfer |       |       |       |       |       |
| 4 | 16 | 9371 -12 | positive serum | 18.43 | 17.49                                                  | 17.15 | 17.71 | 18.69 | 19.20 | 19.28 |
| 5 | 17 | 9422 -3  | positive serum | 22.08 | 21.12                                                  | 20.65 | 21.02 | 21.45 | 22.06 | 22.01 |
| 5 | 18 | 9422 -12 | positive serum | 21.25 | 19.80                                                  | 20.08 | 20.64 | 20.93 | 21.43 | 20.40 |
| 5 | 19 | 9469 -3  | positive serum | 19.49 | 17.48                                                  | 17.55 | 17.88 | 18.5  | 18.56 | 18.25 |
| 5 | 20 | 9469 -12 | positive serum | 21.12 | 20.72                                                  | 21.35 | 21.49 | 21.51 | 21.71 | 20.62 |
| 6 | 21 | 9476 -2  | positive serum | 22.45 | 20.42                                                  | 21.07 | 21.2  | 21.98 | 22.35 | 22.3  |
| 6 | 22 | 9476 -12 | positive serum | 21.66 | 20.02                                                  | 20.15 | 20.90 | 21.71 | 21.81 | 22.03 |
| 6 | 23 | 9568 -3  | positive serum | 21.05 | 20.24                                                  | 20.45 | 20.90 | 21.45 | 21.18 | 21.66 |
| 6 | 24 | 9568 -12 | positive serum | 18.69 | 19.26                                                  | 19.39 | 19.45 | 19.97 | 19.96 | 20.07 |
| 7 | 25 | 9571 -2  | positive serum | 22.71 | 20.20                                                  | 21.18 | 21.9  | 22.43 | 23.18 | 23.42 |
| 7 | 26 | 9571 -12 | positive serum | 23.14 | 23.27                                                  | 24.39 | 24.12 | 24.62 | 24.88 | 23.11 |
| 7 | 27 | 9576 -3  | positive serum | 21.03 | euthanized due to adverse reaction from serum transfer |       |       |       |       |       |
| 7 | 28 | 9576 -12 | positive serum | 20.16 | 20.52                                                  | 20.99 | 21.25 | 21.52 | 21.65 | 21.16 |
| 8 | 29 | 9598 -3  | positive serum | 21.28 | 20.38                                                  | 20.53 | 21.18 | 21.96 | 22.08 | 22.17 |

**Immunogenicity, safety, and anti-viral efficacy of a subunit SARS-CoV-2 vaccine candidate in captive black-footed ferrets (*Mustela nigripes*) and their susceptibility to viral challenge.**

Ariel E. Leon <sup>1</sup>, Della Garelle <sup>2</sup>, Airn Hartwig <sup>3</sup>, Elizabeth A. Falendysz <sup>1</sup>, Hon S. Ip <sup>1</sup>, Julia S. Lankton <sup>1</sup>, Tyler N. Tretten <sup>2</sup>, Terry R. Spraker <sup>4</sup>, Richard Bowen <sup>3,†</sup>, Tonie E. Rocke <sup>1,\*,†</sup>

|    |    |          |                |       |                                                        |       |       |       |       |       |
|----|----|----------|----------------|-------|--------------------------------------------------------|-------|-------|-------|-------|-------|
| 8  | 30 | 9598 -12 | positive serum | 22.47 | 20.27                                                  | 22.65 | 22.10 | 22.34 | 22.67 | 20.78 |
| 9  | 31 | 8710 -3  | negative serum | 21.30 | 19.16                                                  | 20.02 | 20.02 | 20.66 | 20.66 | 20.91 |
| 9  | 32 | 8710 -12 | negative serum | 22.37 | 21.15                                                  | 21.50 | 22.16 | 22.18 | 23.65 | 22.00 |
| 10 | 33 | 8721 -3  | negative serum | 20.38 | euthanized due to adverse reaction from serum transfer |       |       |       |       |       |
| 10 | 34 | 8721 -12 | negative serum | 22.85 | 22.07                                                  | 22.35 | 22.78 | 23.52 | 24.57 | 23.12 |
| 10 | 35 | 8970 -2  | negative serum | 18.20 | 16.44                                                  | 17.25 | 17.63 | 18.27 | 19.01 | 18.70 |
| 10 | 36 | 8970 -12 | negative serum | 23.33 | 23.30                                                  | 23.9  | 24.04 | 25.54 | 25.67 | 25.91 |
| 11 | 37 | 9247 -3  | negative serum | 20.45 | euthanized due to adverse reaction from serum transfer |       |       |       |       |       |
| 11 | 38 | 9247 -12 | negative serum | 22.87 | 23.44                                                  | 23.4  | 23.42 | 23.70 | 23.48 | 24.43 |
| 11 | 39 | 9311 -2  | negative serum | 16.44 | euthanized due to adverse reaction from serum transfer |       |       |       |       |       |
| 11 | 40 | 9311 -12 | negative serum | 21.78 | 22.70                                                  | 21.83 | 22.60 | 23.62 | 23.77 | 23.20 |
| 12 | 41 | 9388 -3  | negative serum | 20.30 | euthanized due to adverse reaction from serum transfer |       |       |       |       |       |
| 12 | 42 | 9388 -12 | negative serum | 18.09 | euthanized due to adverse reaction from serum transfer |       |       |       |       |       |
| 12 | 43 | 9425 -3  | negative serum | 18.10 | euthanized due to adverse reaction from serum transfer |       |       |       |       |       |
| 12 | 44 | 9425 -12 | negative serum | 19.61 | euthanized due to adverse reaction from serum transfer |       |       |       |       |       |
| 13 | 45 | 9519 -3  | negative serum | 22.08 | euthanized due to adverse reaction from serum transfer |       |       |       |       |       |
| 13 | 46 | 9519 -12 | negative serum | 18.85 | 19.08                                                  | 18.46 | 19.28 | 19.25 | 20.03 | 19.61 |

**Immunogenicity, safety, and anti-viral efficacy of a subunit SARS-CoV-2 vaccine candidate in captive black-footed ferrets (*Mustela nigripes*) and their susceptibility to viral challenge.**

Ariel E. Leon <sup>1</sup>, Della Garelle <sup>2</sup>, Airn Hartwig <sup>3</sup>, Elizabeth A. Falendysz <sup>1</sup>, Hon S. Ip <sup>1</sup>, Julia S. Lankton <sup>1</sup>, Tyler N. Tretten <sup>2</sup>, Terry R. Spraker <sup>4</sup>, Richard Bowen <sup>3,†</sup>, Tonie E. Roche <sup>1,\*,†</sup>

|    |    |          |                |       |       |       |       |       |       |       |
|----|----|----------|----------------|-------|-------|-------|-------|-------|-------|-------|
| 13 | 47 | 9592 -3  | negative serum | 21.26 | 20.13 | 20.28 | 20.54 | 21.13 | 22.00 | 22.25 |
| 13 | 48 | 9592 -12 | negative serum | 21.38 | 20.75 | 21.82 | 22.22 | 22.2  | 22.72 | 22.98 |
| 14 | 49 | 20 ug Ab | monoclonal AB  | 21.45 | 21.33 | 21.30 | 21.42 | 22.2  | 21.58 | 21.96 |
| 14 | 50 | 20 ug Ab | monoclonal AB  | 19.56 | 20.36 | 20.95 | 21.49 | 21.82 | 21.23 | 21.60 |
| 14 | 51 | 20 ug Ab | monoclonal AB  | 21.49 | 21.93 | 22.18 | 21.98 | 22.27 | 22.01 | 22.13 |
| 14 | 52 | 20 ug Ab | monoclonal AB  | 18.81 | 19.74 | 20.02 | 20.39 | 20.55 | 21.22 | 20.43 |
| 15 | 53 | PBS      | negative       | 22.21 | 21.45 | 21.89 | 21.89 | 22.49 | 22.57 | 22.81 |
| 15 | 54 | PBS      | negative       | 23.55 | 23.20 | 23.80 | 23.33 | 23.63 | 24.24 | 24.23 |
| 15 | 55 | PBS      | negative       | 22.60 | 23.41 | 23.20 | 23.35 | 23.73 | 23.86 | 23.72 |
| 15 | 56 | PBS      | negative       | 23.30 | 23.46 | 24.31 | 23.98 | 24.63 | 25.16 | 24.36 |

**Immunogenicity, safety, and anti-viral efficacy of a subunit SARS-CoV-2 vaccine candidate in captive black-footed ferrets (*Mustela nigripes*) and their susceptibility to viral challenge.**

Ariel E. Leon <sup>1</sup>, Della Garelle <sup>2</sup>, Airn Hartwig <sup>3</sup>, Elizabeth A. Falendysz <sup>1</sup>, Hon S. Ip <sup>1</sup>, Julia S. Lankton <sup>1</sup>, Tyler N. Tretten <sup>2</sup>, Terry R. Spraker <sup>4</sup>, Richard Bowen <sup>3,†</sup>, Tonie E. Rocke <sup>1,\*,†</sup>

**Table S2.** Histology results in mice that received positive serum (PS) from black-footed ferrets (*Mustela nigripes*; BFF) vaccinated against SARS-CoV-2, negative serum (NS) from unvaccinated BFF, or monoclonal antibody (MAB) against SARS-CoV-2 and were then challenged with SARS-CoV-2. Negative control animals received phosphate buffered saline but were not challenged. BH=brain hemorrhage; PVC=perivascular cuffing; GL=gliosis, LH=lung hemorrhage, LPI= lung perivascular inflammation, IP= interstitial pneumonia, LE= lung edema.

| ID | Treat-<br>ment | BH | BH<br>count | PVC | PVC<br>count | GL | LH | LPI | IP | IP %       | LE | Brain<br>Grade | Lung<br>Grade | Total<br>Grade |
|----|----------------|----|-------------|-----|--------------|----|----|-----|----|------------|----|----------------|---------------|----------------|
| 1  | PS             | +  | 2           | -   |              | -  | +  | +   | +  | <10        | -  | 0              | 1             | 1              |
| 2  | PS             | -  |             | -   |              | -  | +  | +   | +  | <10        | -  | 0              | 1             | 1              |
| 3  | PS             | +  | 1           | +   | 7            | +  | +  | +   | +  | 20-<br>40% | -  | 1              | 3             | 4              |
| 4  | PS             | +  | 3           | -   |              | -  | +  | -   | -  |            | -  | 0              | 0             | 0              |
| 6  | PS             | -  |             | +   | 16           | +  | +  | -   | -  |            | -  | 2              | 0             | 2              |
| 8  | PS             | -  |             | -   |              | -  | +  | +   | +  | 20-<br>40% | -  | 0              | 3             | 3              |
| 9  | PS             | +  | 2           | -   |              | -  | +  | +   | +  | 10-<br>20% | -  | 0              | 2             | 2              |
| 10 | PS             | -  |             | -   |              | -  | +  | +   | +  | 40-<br>50% | +  | 0              | 4             | 4              |
| 11 | PS             | +  | 3           | -   |              | -  | +  | +   | +  | <10        | -  | 0              | 1             | 1              |
| 12 | PS             | +  | 3           | -   |              | -  | +  | -   | +  | 10-<br>20% | -  | 0              | 2             | 2              |
| 14 | PS             | -  |             | -   |              | -  | +  | +   | +  | 20-<br>40% | -  | 0              | 3             | 3              |
| 16 | PS             | +  | 2           | -   |              | -  | +  | +   | +  | 20-<br>40% | +  | 0              | 3             | 3              |
| 17 | PS             | +  | 2           | -   |              | -  | +  | +   | -  |            | -  | 0              | 0             | 0              |
| 18 | PS             | +  | 2           | +   | 14           | +  | +  | +   | +  | <10        | -  | 2              | 1             | 3              |
| 19 | PS             | -  |             | +   | 2            | +  | +  | +   | -  |            | -  | 1              | 0             | 1              |

**Immunogenicity, safety, and anti-viral efficacy of a subunit SARS-CoV-2 vaccine candidate in captive black-footed ferrets (*Mustela nigripes*) and their susceptibility to viral challenge.**

Ariel E. Leon <sup>1</sup>, Della Garelle <sup>2</sup>, Airn Hartwig <sup>3</sup>, Elizabeth A. Falendysz <sup>1</sup>, Hon S. Ip <sup>1</sup>, Julia S. Lankton <sup>1</sup>, Tyler N. Tretten <sup>2</sup>, Terry R. Spraker <sup>4</sup>, Richard Bowen <sup>3,†</sup>, Tonie E. Rocke <sup>1,\*,†</sup>

|             |    |   |            |   |             |   |   |   |   |        |   |            |          |            |
|-------------|----|---|------------|---|-------------|---|---|---|---|--------|---|------------|----------|------------|
| 20          | PS | - |            | + | 9           | + | + | - | - |        | - | 1          | 0        | 1          |
| 21          | PS | - |            | - |             | - | + | + | + | <10    | - | 0          | 1        | 1          |
| 22          | PS | + | 1          | - |             | - | + | + | + | >50    | - | 0          | 5        | 5          |
| 23          | PS | - |            | - |             | - | + | + | + | 40-50% | + | 0          | 4        | 4          |
| 24          | PS | - |            | - |             | - | + | + | + | 20-40% | + | 0          | 3        | 3          |
| 25          | PS | + | 1          | - |             | - | + | + | + | <10    | - | 0          | 1        | 1          |
| 26          | PS | - |            | - |             | - | + | + | + | >50    | + | 0          | 5        | 5          |
| 28          | PS | + | 1          | - |             | - | + | + | + | >50    | + | 0          | 5        | 5          |
| 29          | PS | - |            | + | 28          | - | - | + | + | <10    | - | 3          | 1        | 4          |
| 30          | PS | + | 2          | - |             | - | + | + | + | <10    | - | 0          | 1        | 1          |
| <b>Mean</b> |    |   | <b>1.9</b> |   | <b>12.7</b> |   |   |   |   |        |   | <b>0.4</b> | <b>2</b> | <b>2.4</b> |
|             |    |   |            |   |             |   |   |   |   |        |   |            |          |            |
| 31          | NS | + | 2          | - |             | - | + | + | + | >50    | + | 0          | 5        | 5          |
| 32          | NS | + | 3          | + | 2           | + | + | + | + | <10    | - | 1          | 1        | 2          |
| 34          | NS | - |            | + | 4           | + | + | - | - |        | - | 1          | 0        | 1          |
| 35          | NS | - |            | + | 12          | - | + | + | + | 20-40% | + | 2          | 3        | 5          |
| 36          | NS | - |            | - |             | - | - | + | + | <10    | - | 0          | 1        | 1          |
| 38          | NS | - |            | - |             | - | + | + | + | <10    | - | 0          | 1        | 1          |
| 40          | NS | - |            | - |             | - | + | + | + | <10    | - | 0          | 1        | 1          |
| 46          | NS | - |            | - |             | - | + | + | + | 40-50% | + | 0          | 4        | 4          |
| 47          | NS | + | 3          | - |             | - | + | + | + | 20-40% | + | 0          | 3        | 3          |
| 48          | NS | + | 6          | - |             | - | + | + | + | 20-40% | + | 0          | 3        | 3          |

**Immunogenicity, safety, and anti-viral efficacy of a subunit SARS-CoV-2 vaccine candidate in captive black-footed ferrets (*Mustela nigripes*) and their susceptibility to viral challenge.**

Ariel E. Leon <sup>1</sup>, Della Garell <sup>2</sup>, Airn Hartwig <sup>3</sup>, Elizabeth A. Falendysz <sup>1</sup>, Hon S. Ip <sup>1</sup>, Julia S. Lankton <sup>1</sup>, Tyler N. Tretten <sup>2</sup>, Terry R. Spraker <sup>4</sup>, Richard Bowen <sup>3,†</sup>, Tonie E. Roche <sup>1,\*,†</sup>

|             |     |   |            |   |          |   |   |   |   |     |   |            |          |          |
|-------------|-----|---|------------|---|----------|---|---|---|---|-----|---|------------|----------|----------|
| <b>Mean</b> |     |   | <b>3.5</b> |   | <b>6</b> |   |   |   |   |     |   | <b>0.4</b> | <b>2</b> | <b>3</b> |
|             |     |   |            |   |          |   |   |   |   |     |   |            |          |          |
| 49          | MAB | - |            | - |          | - | + | + | + | <10 | + | 0          | 1        | 1        |
| 50          | MAB | - |            | - |          | - | + | - | + | <10 | - | 0          | 1        | 1        |
| 51          | MAB | - |            | - |          | - | + | + | + | <10 | - | 0          | 1        | 1        |
| 52          | MAB | + | 5          | - |          | - | + | + | + | <10 | - | 0          | 1        | 1        |
| <b>Mean</b> |     |   | <b>5</b>   |   |          |   |   |   |   |     |   | <b>0</b>   | <b>1</b> | <b>1</b> |
|             |     |   |            |   |          |   |   |   |   |     |   |            |          |          |
| 53          | PBS | + | 1          | - |          | - | + | - | - |     | - | 0          | 0        | 0        |
| 54          | PBS | + | 1          | - |          | - | + | - | - |     | - | 0          | 0        | 0        |
| 55          | PBS | + | 1          | - |          | - | + | - | - |     | - | 0          | 0        | 0        |
| 56          | PBS | + | 3          | - |          | - | + | - | - |     | - | 0          | 0        | 0        |
| <b>Mean</b> |     |   | <b>1.5</b> |   |          |   |   |   |   |     |   | <b>0</b>   | <b>0</b> | <b>0</b> |

**Immunogenicity, safety, and anti-viral efficacy of a subunit SARS-CoV-2 vaccine candidate in captive black-footed ferrets (*Mustela nigripes*) and their susceptibility to viral challenge.**

Ariel E. Leon <sup>1</sup>, Della Garelle <sup>2</sup>, Airn Hartwig <sup>3</sup>, Elizabeth A. Falendysz <sup>1</sup>, Hon S. Ip <sup>1</sup>, Julia S. Lankton <sup>1</sup>, Tyler N. Tretten <sup>2</sup>, Terry R. Spraker <sup>4</sup>, Richard Bowen <sup>3,†</sup>, Tonie E. Roche <sup>1,\*,†</sup>

**Table S3.** Histology grades in mice that received positive serum (PS) from black-footed ferrets (*Mustela nigripes*; BFF) vaccinated against SARS-CoV-2, negative serum (NS) from unvaccinated BFF, or monoclonal antibody (MAB) against SARS-CoV-2 and were then challenged with SARS-CoV-2. Lung grade, brain grade and total grade are listed relative to lung viral loads (CDC N2 Ct) as well as the ELISA titer of the serum that was transferred.

| Mouse ID | BFF ID   | Treatment | ELISA titer | CDC N2 Ct | CPE | Lung Grade | Brain Grade | Total Grade |
|----------|----------|-----------|-------------|-----------|-----|------------|-------------|-------------|
| 1        | 8593 -3  | PS        | 2560        | 20.993    | Pos | 1          | 0           | 1           |
| 2        | 8593 -12 | PS        | 640         | 21.150    | Pos | 1          | 0           | 1           |
| 3        | 8847 -2  | PS        | 10240       | 16.967    | Pos | 3          | 1           | 4           |
| 4        | 8847 -12 | PS        | 2560        | 24.253    | Pos | 0          | 0           | 0           |
| 6        | 8995 -12 | PS        | 10240       | 17.390    | Pos | 0          | 2           | 2           |
| 8        | 9135 -12 | PS        | 2560        | 20.920    | Pos | 3          | 0           | 3           |
| 9        | 9189 -3  | PS        | 10240       | 20.940    | Pos | 2          | 0           | 2           |
| 10       | 9189 -12 | PS        | 2560        | 19.970    | Pos | 4          | 0           | 4           |
| 11       | 9219 -3  | PS        | 10240       | 37.788    | Neg | 1          | 0           | 1           |
| 12       | 9219 -12 | PS        | 10240       | 21.213    | Pos | 2          | 0           | 2           |
| 14       | 9337 -12 | PS        | 10240       | 14.824    | Pos | 3          | 0           | 3           |
| 16       | 9371 -12 | PS        | 2560        | 19.801    | Pos | 3          | 0           | 3           |
| 17       | 9422 -3  | PS        | 40960       |           | Neg | 0          | 0           | 0           |
| 18       | 9422 -12 | PS        | 2560        | 23.401    | Pos | 1          | 2           | 3           |
| 19       | 9469 -3  | PS        | 10240       | 33.596    | Neg | 0          | 1           | 1           |
| 20       | 9469 -12 | PS        | 2560        | 20.113    | Pos | 0          | 1           | 1           |
| 21       | 9476 -2  | PS        | 10240       | 24.980    | Pos | 1          | 0           | 1           |
| 22       | 9476 -12 | PS        | 2560        | 18.166    | Pos | 5          | 0           | 5           |
| 23       | 9568 -3  | PS        | 10240       | 22.666    | Pos | 4          | 0           | 4           |



**Immunogenicity, safety, and anti-viral efficacy of a subunit SARS-CoV-2 vaccine candidate in captive black-footed ferrets (*Mustela nigripes*) and their susceptibility to viral challenge.**

Ariel E. Leon <sup>1</sup>, Della Garelle <sup>2</sup>, Airn Hartwig <sup>3</sup>, Elizabeth A. Falendysz <sup>1</sup>, Hon S. Ip <sup>1</sup>, Julia S. Lankton <sup>1</sup>, Tyler N. Tretten <sup>2</sup>, Terry R. Spraker <sup>4</sup>, Richard Bowen <sup>3,†</sup>, Tonie E. Roche <sup>1,\*,†</sup>

|    |          |     |       |          |     |   |   |   |
|----|----------|-----|-------|----------|-----|---|---|---|
| 24 | 9568 -12 | PS  | 2560  | 20.829   | Pos | 3 | 0 | 3 |
| 25 | 9571 -2  | PS  | 40960 | 29.669   | Neg | 1 | 0 | 1 |
| 26 | 9571 -12 | PS  | 2560  | 15.902   | Pos | 5 | 0 | 5 |
| 28 | 9576 -12 | PS  | 160   | 15.113   | Pos | 5 | 0 | 5 |
| 29 | 9598 -3  | PS  | 2560  | 19.735   | Pos | 1 | 3 | 4 |
| 30 | 9598 -12 | PS  | 0     | 15.937   | Pos | 1 | 0 | 1 |
| 31 | 8710 -3  | NS  | 160   | 22.153   | Pos | 5 | 0 | 5 |
| 32 | 8710 -12 | NS  | 160   | 18.972   | Pos | 1 | 1 | 2 |
| 34 | 8721 -12 | NS  | 160   | 16.448   | Pos | 0 | 1 | 1 |
| 35 | 8970 -2  | NS  | 160   | 18.673   | Pos | 3 | 2 | 5 |
| 36 | 8970 -12 | NS  | 160   | 22.603   | Pos | 1 | 0 | 1 |
| 38 | 9247 -12 | NS  | 160   | 18.836   | Pos | 1 | 0 | 1 |
| 40 | 9311 -12 | NS  | 160   | 20.337   | Pos | 1 | 0 | 1 |
| 46 | 9519 -12 | NS  | 160   | 20.146   | Pos | 4 | 0 | 4 |
| 47 | 9592 -3  | NS  | 160   | 19.587   | Pos | 3 | 0 | 3 |
| 48 | 9592 -12 | NS  | 160   | 20.690   | Pos | 3 | 0 | 3 |
| 49 | 20 ug Ab | MAB |       | 26.439   | Neg | 1 | 0 | 1 |
| 50 | 20 ug Ab | MAB |       | 29.120   | Neg | 1 | 0 | 1 |
| 51 | 20 ug Ab | MAB |       | 26.645   | Neg | 1 | 0 | 1 |
| 52 | 20 ug Ab | MAB |       | 39.650   | Neg | 1 | 0 | 1 |
| 53 |          | PBS |       | Not done | Neg | 0 | 0 | 0 |
| 54 |          | PBS |       | Not done | Neg | 0 | 0 | 0 |

**Immunogenicity, safety, and anti-viral efficacy of a subunit SARS-CoV-2 vaccine candidate in captive black-footed ferrets (*Mustela nigripes*) and their susceptibility to viral challenge.**

Ariel E. Leon <sup>1</sup>, Della Garelle <sup>2</sup>, Airn Hartwig <sup>3</sup>, Elizabeth A. Falendysz <sup>1</sup>, Hon S. Ip <sup>1</sup>, Julia S. Lankton <sup>1</sup>, Tyler N. Tretten <sup>2</sup>, Terry R. Spraker <sup>4</sup>, Richard Bowen <sup>3,†</sup>, Tonie E. Rocke <sup>1,\*,†</sup>

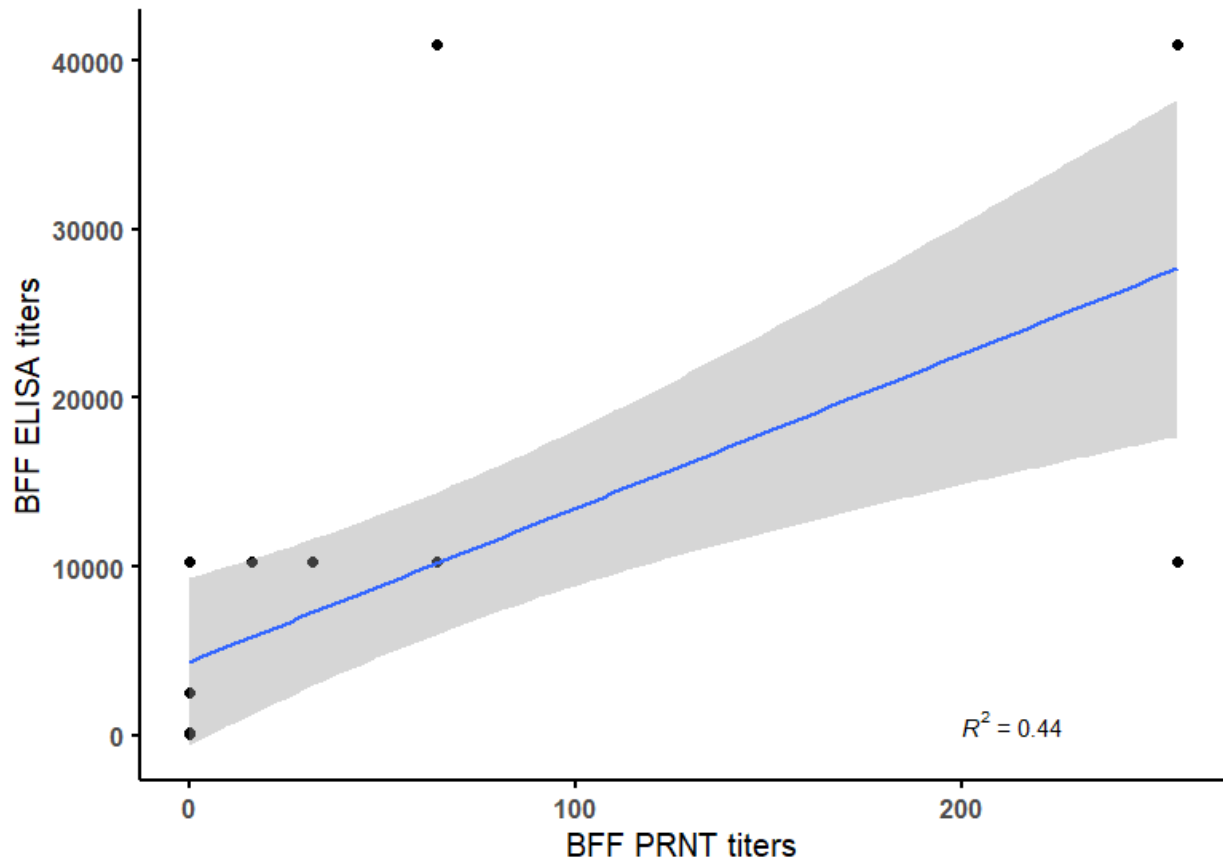

**Figure S1.** SARS-CoV-2 vaccinated black footed-ferret (*Mustela nigripes*; BFF) anti-S1 SARS-CoV-2 enzyme linked immunosorbent assay (ELISA) titers by their plaque reduction neutralization (PRNT<sub>50</sub>) titers at 2-3 weeks post-boost. Each point represents an individual. The line represents a best fit linear regression, and shading represents the standard error of that regression.

**Immunogenicity, safety, and anti-viral efficacy of a subunit SARS-CoV-2 vaccine candidate in captive black-footed ferrets (*Mustela nigripes*) and their susceptibility to viral challenge.**

Ariel E. Leon <sup>1</sup>, Della Garelle <sup>2</sup>, Airn Hartwig <sup>3</sup>, Elizabeth A. Falendysz <sup>1</sup>, Hon S. Ip <sup>1</sup>, Julia S. Lankton <sup>1</sup>, Tyler N. Tretten <sup>2</sup>, Terry R. Spraker <sup>4</sup>, Richard Bowen <sup>3,†</sup>, Tonie E. Rocke <sup>1,\*,†</sup>

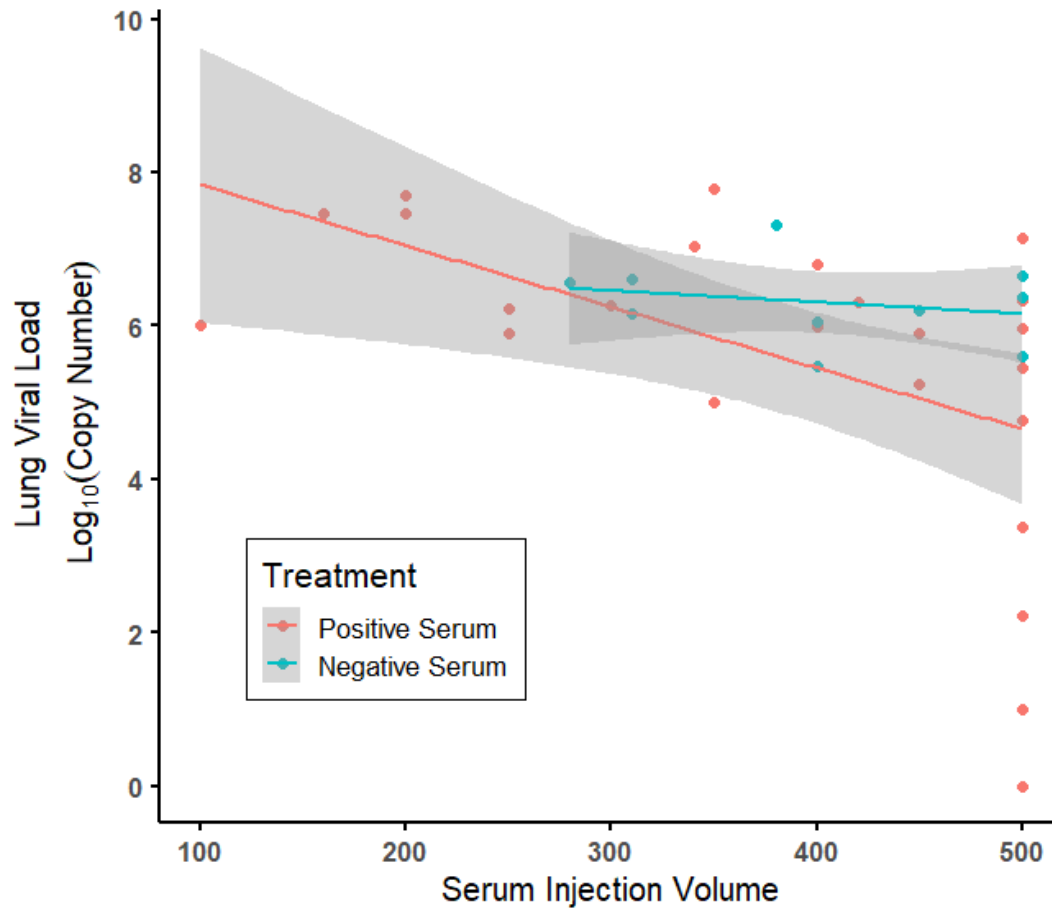

**Figure S2.** Lung viral load serum by intraperitoneal injection serum volume for mice treated with either black-footed ferret (*Mustela nigripes*; BFF) serum positive for anti-S1ARS-CoV-2 antibodies, or BFF serum negative for anti-S1 SARS-CoV-2 antibodies. The lines represent best fit linear regressions, and shading represents the standard error of that regression.

**Immunogenicity, safety, and anti-viral efficacy of a subunit SARS-CoV-2 vaccine candidate in captive black-footed ferrets (*Mustela nigripes*) and their susceptibility to viral challenge.**

Ariel E. Leon <sup>1</sup>, Della Garelle <sup>2</sup>, Airn Hartwig <sup>3</sup>, Elizabeth A. Falendysz <sup>1</sup>, Hon S. Ip <sup>1</sup>, Julia S. Lankton <sup>1</sup>, Tyler N. Tretten <sup>2</sup>, Terry R. Spraker <sup>4</sup>, Richard Bowen <sup>3,†</sup>, Tonie E. Rocke <sup>1,\*,†</sup>

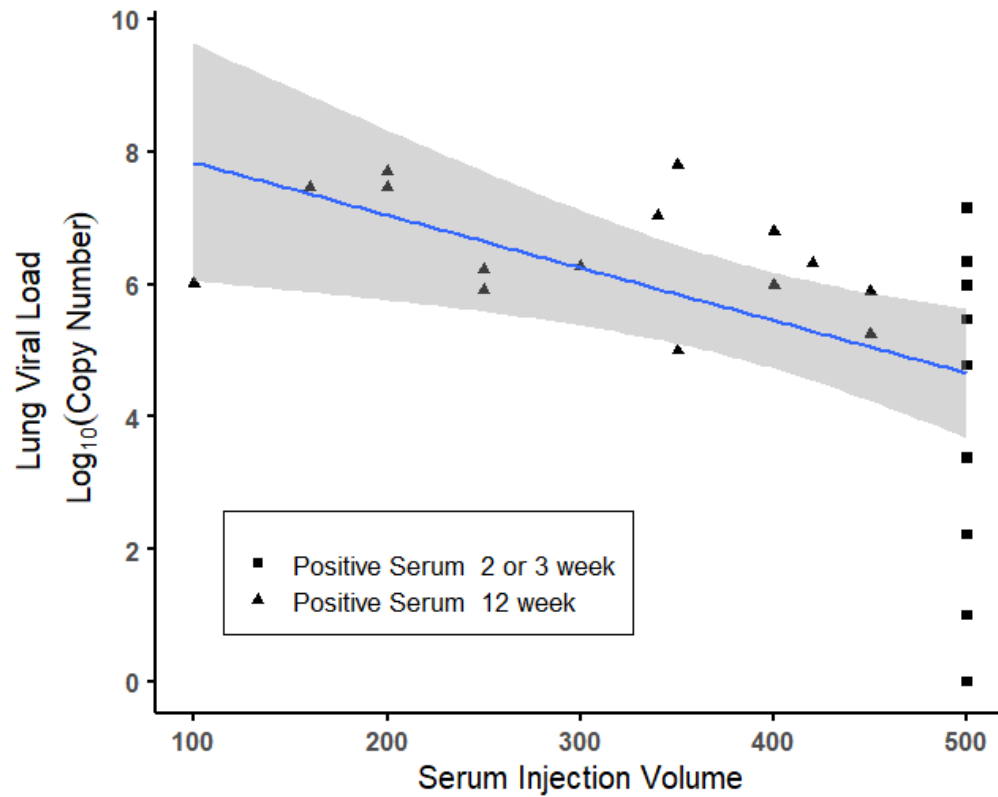

**Figure S3.** Lung viral load serum by intraperitoneal injection serum volume for mice treated with black-footed ferret (*Mustela nigripes*) serum positive for anti-S1 SARS-CoV-2 antibodies, either 2-3 week (represented by square points) or 12-week post-boost (triangular points). The line represents a best fit linear regression, shading representing the standard error of that regression.

**Immunogenicity, safety, and anti-viral efficacy of a subunit SARS-CoV-2 vaccine candidate in captive black-footed ferrets (*Mustela nigripes*) and their susceptibility to viral challenge.**

Ariel E. Leon <sup>1</sup>, Della Garelle <sup>2</sup>, Airn Hartwig <sup>3</sup>, Elizabeth A. Falendysz <sup>1</sup>, Hon S. Ip <sup>1</sup>, Julia S. Lankton <sup>1</sup>, Tyler N. Tretten <sup>2</sup>, Terry R. Spraker <sup>4</sup>, Richard Bowen <sup>3,†</sup>, Tonie E. Rocke <sup>1,\*,†</sup>

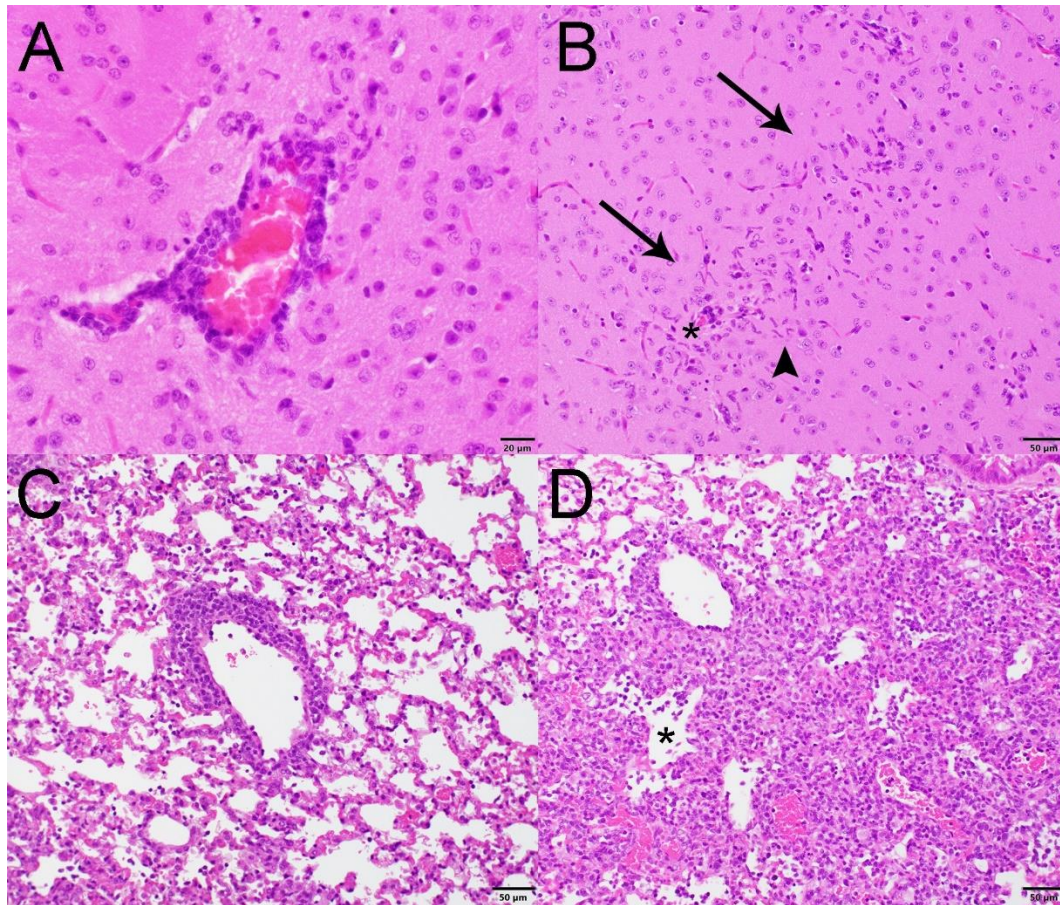

**Figure S4.** Photomicrographs of lesions in K18-hACE-2 mice inoculated intraperitoneally with serum from SARS-CoV-2 vaccinated (A and B) and control (C and D) black-footed ferrets (*Mustela nigripes*; BFF) and inoculated intranasally with SARS-CoV-2. (A) Brain: A blood vessel is surrounded by low numbers of lymphocytes, plasma cells, and histiocytes (perivascular cuffing). Hematoxylin and eosin stain. (B) Brain: An area of gliosis (arrows) is characterized by hypercellularity with many elongate microglial nuclei (arrowhead). A small blood vessel with few adjacent mononuclear cells is within this area (asterisk). Hematoxylin and eosin stain. (C) Lung: An interstitial blood vessel is surrounded by low numbers of lymphocytes, plasma cells, and histiocytes. Hematoxylin and eosin stain. (D) Lung: The majority of alveolar septa are expanded by large numbers of lymphocytes, plasma cells, and histiocytes. Similar inflammatory cells are within remaining alveolar spaces (asterisk). Hematoxylin and eosin stain.

**Immunogenicity, safety, and anti-viral efficacy of a subunit SARS-CoV-2 vaccine candidate in captive black-footed ferrets (*Mustela nigripes*) and their susceptibility to viral challenge.**

Ariel E. Leon <sup>1</sup>, Della Garelle <sup>2</sup>, Airn Hartwig <sup>3</sup>, Elizabeth A. Falendysz <sup>1</sup>, Hon S. Ip <sup>1</sup>, Julia S. Lankton <sup>1</sup>, Tyler N. Tretten <sup>2</sup>, Terry R. Spraker <sup>4</sup>, Richard Bowen <sup>3,†</sup>, Tonie E. Roche <sup>1,\*,†</sup>

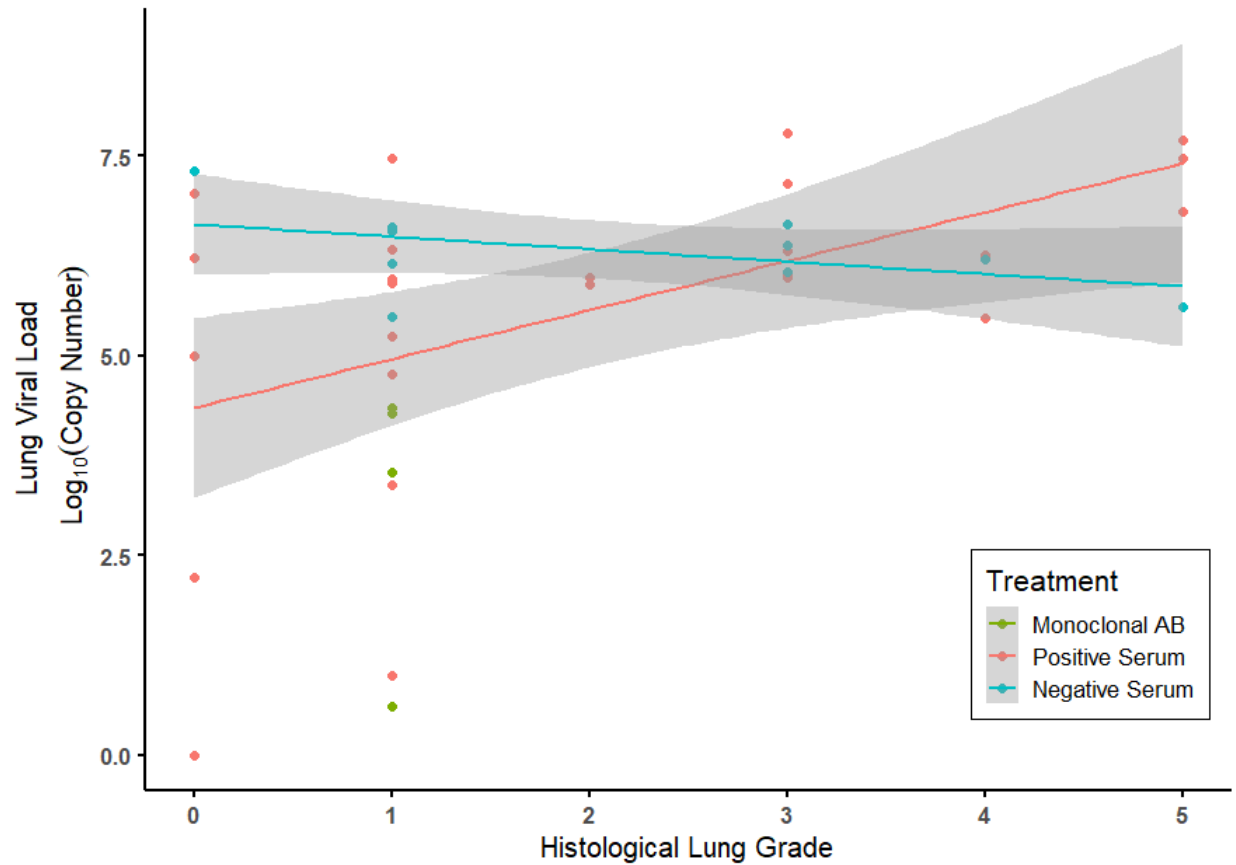

**Figure S5.** Lung viral load by histological lung grade for mice treated with either Monoclonal antibodies (AB), black-footed ferret (*Mustela nigripes*; BFF) serum positive for anti-S1 SARS-CoV-2 antibodies, or BFF serum negative for anti-S1 SARS-CoV-2 antibodies. The lines represent best fit linear regressions, and shading represents the standard error of that regression.



**Immunogenicity, safety, and anti-viral efficacy of a subunit SARS-CoV-2 vaccine candidate in captive black-footed ferrets (*Mustela nigripes*) and their susceptibility to viral challenge.**

Ariel E. Leon <sup>1</sup>, Della Garelle <sup>2</sup>, Airn Hartwig <sup>3</sup>, Elizabeth A. Falendysz <sup>1</sup>, Hon S. Ip <sup>1</sup>, Julia S. Lankton <sup>1</sup>, Tyler N. Tretten <sup>2</sup>, Terry R. Spraker <sup>4</sup>, Richard Bowen <sup>3,†</sup>, Tonie E. Roche <sup>1,\*,†</sup>

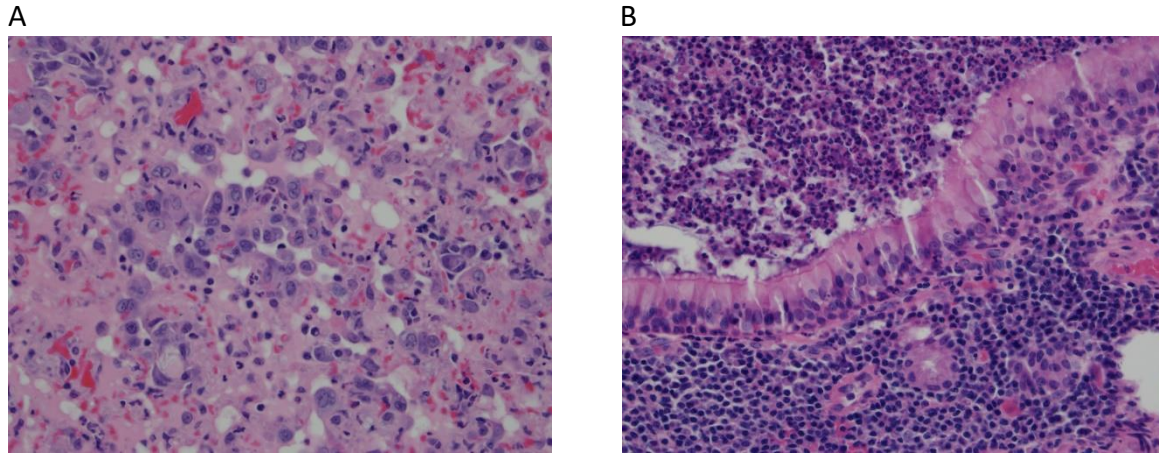

**Figure S6.** Photomicrographs of lung and nasal cavity of black-footed ferrets (*Mustela nigripes*; BFF) examined at days 3 and 14 post-inoculation (PI) with SARS-CoV-2. Histological lesion in the lungs were patchy areas of interstitial pneumonia and were found in all three BFF euthanized at 3 days PI and in one ferret euthanized at 14 days PI (A). Suppurative rhinitis was found in three of the BFF, one euthanized at day 3 PI and two at 14 days PI (B).
